# Supplementary material
Source: publisher figshare collection journal article supplement (https://acs.figshare.com/ndownloader/files/4009264)
Supplement: Supplementary file 1 [file 4009264]

## **Supporting Information**

### **Characterization and suitability of therapeutic antibody dense phases for subcutaneous delivery**

Harvey R. Johnson and Abraham M. Lenhoff

Center for Molecular and Engineering Thermodynamics,  
Department of Chemical and Biomolecular Engineering,  
University of Delaware,  
Newark, Delaware 19716, USA

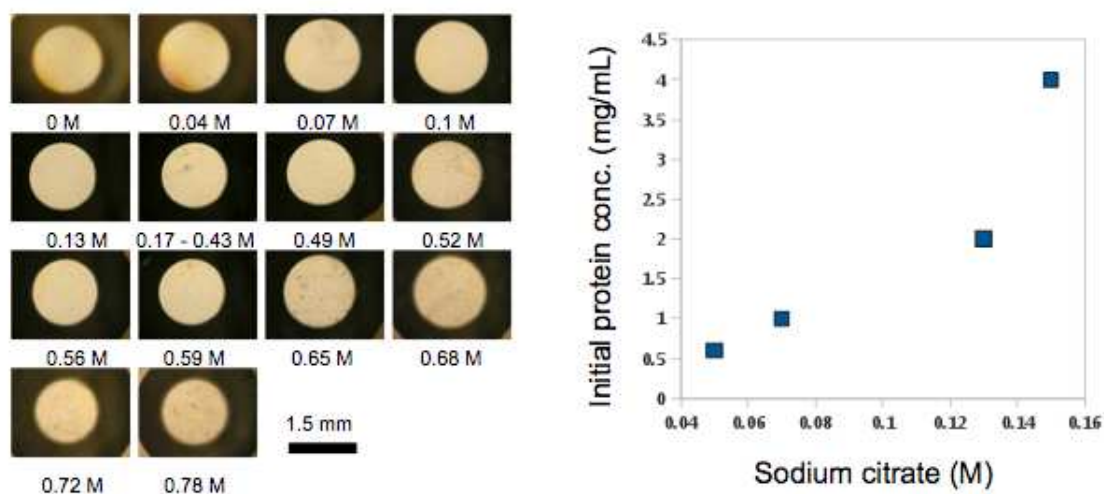

Figure S1. Salting-in and salting-out of mAb B. a) Optical micrographs of phase behavior (1 mg/mL mAb B, pH 5) with various concentrations of sodium citrate. b) Phase diagram for salting-in region as a function of sodium citrate concentration and initial protein concentration; dense phase appears in top left part of diagram.

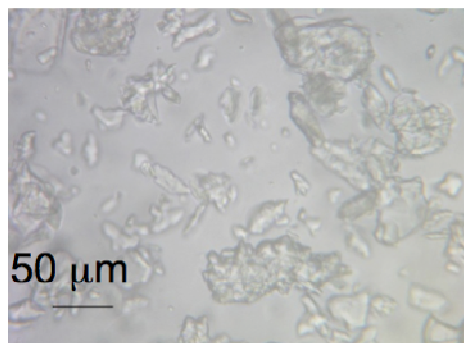

Figure S2. Pulverized sample of crystals of mAb A after pipetting (9% PEG<sub>3350</sub>, 50 mM sodium citrate, pH 5).
